# Supplementary material
Source: publisher site journal article supplement (https://www.dovepress.com/article/285863)
Supplement: Supplementary file 1 [file get_supplementary_file.php]

**Supplemental Table 1**. Search strategy.

| **Database** | **Search string** |
| --- | --- |
| Scopus | ( TITLE-ABS-KEY ( ( migraine OR "Episodic Migraine" OR "Chronic Migraine" OR cm OR "Migraine Disorder" OR "Migraine With Aura" OR "Migraine Without Aura" ) ) ) AND ( TITLE-ABS-KEY ( ( postmenopause OR "Postmenopausal Period" OR "Period, Postmenopausal" OR "Post-Menopause" OR "Post Menopause" OR "Post-Menopauses" OR "Post-menopausal Period" OR "Period, Post-menopausal" OR "Post menopausal Period" ) ) ) AND ( LIMIT-TO ( DOCTYPE , "ar" ) OR LIMIT-TO ( DOCTYPE , "sh" ) ) AND ( EXCLUDE ( LANGUAGE , "Chinese" ) OR EXCLUDE ( LANGUAGE , "Turkish" ) OR EXCLUDE ( LANGUAGE , "German" ) OR EXCLUDE ( LANGUAGE , "Spanish" ) OR EXCLUDE ( LANGUAGE , "French" ) OR EXCLUDE ( LANGUAGE , "Polish" ) OR EXCLUDE ( LANGUAGE , "Portuguese" ) OR EXCLUDE ( LANGUAGE , "Russian" ) OR EXCLUDE ( LANGUAGE , "Hungarian" ) OR EXCLUDE ( LANGUAGE , "Japanese" ) OR EXCLUDE ( LANGUAGE , "Czech" ) OR EXCLUDE ( LANGUAGE , "Dutch" ) OR EXCLUDE ( LANGUAGE , "Estonian" ) OR EXCLUDE ( LANGUAGE , "Greek" ) OR EXCLUDE ( LANGUAGE , "Persian" ) ) |
| Web of Science | ALL=(( migraine OR "Episodic Migraine" OR "Chronic Migraine" OR cm OR "Migraine Disorder" OR "Migraine With Aura" OR "Migraine Without Aura" ) AND ( postmenopause OR "Postmenopausal Period" OR "Period, Postmenopausal" OR "Post-Menopause" OR "Post Menopause" OR "Post-Menopauses" OR "Post-menopausal Period" OR "Period, Post-menopausal" OR "Post menopausal Period" ))  Refined by: DOCUMENT TYPES: ( ARTICLE ) AND [excluding] LANGUAGES: ( SPANISH OR RUSSIAN OR CZECH OR PORTUGUESE ) |
